# Supplementary material for: A Comparative Study on Nickel Binding to Hpn-like Polypeptides from Two Helicobacter pylori Strains
Source: MDPI journal article supplement (doi:10.3390/ijms222413210), 2021-12-08
Supplement: s1 [file s1]

# **A comparative study on nickel binding to Hpn-like polipeptides from two *Helicobacter pylori* strains.**

*D. Witkowska, A. Szebesczyk, A. Watly, M. Rowińska-Żyrek, M. Braczkowski*

## **Supplementary materials**

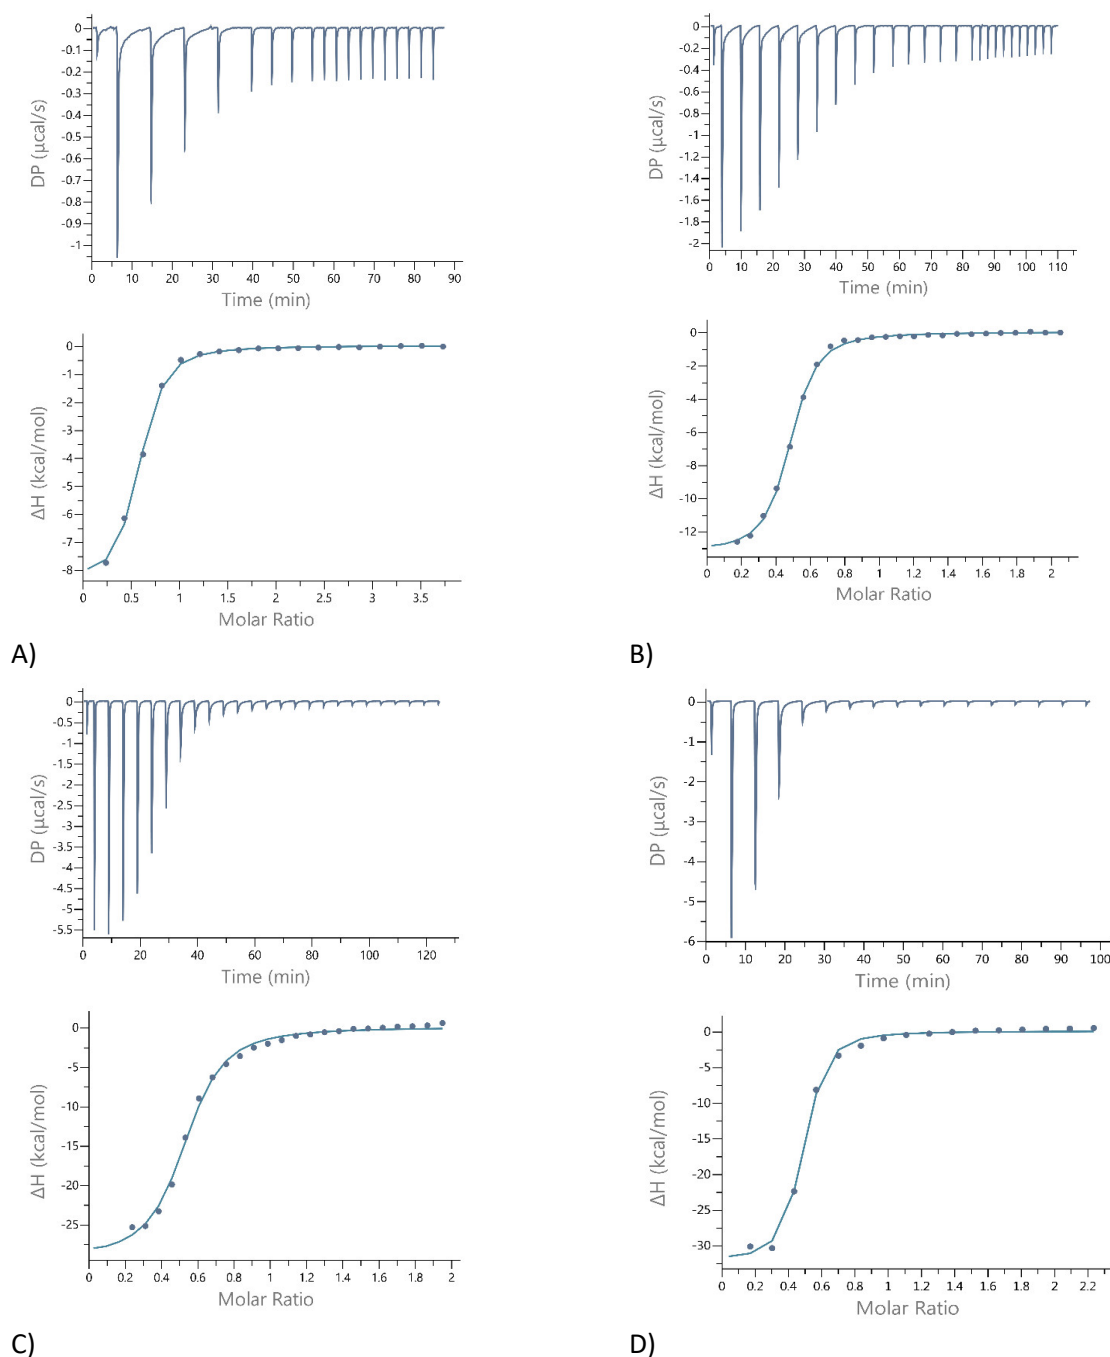

**Figure S1.** The best-fit ITC data for the 37 °C titration of 2mM Ni(II) into (A) Hpn11, (B) Hpn12, (C) Hpn13, (D) Hpn13a peptides in 20mM TRIS-HCl buffer + 500mM NaCl, pH 7.40. The peptides concentration was within the range of 100-200  $\mu\text{M}$ .

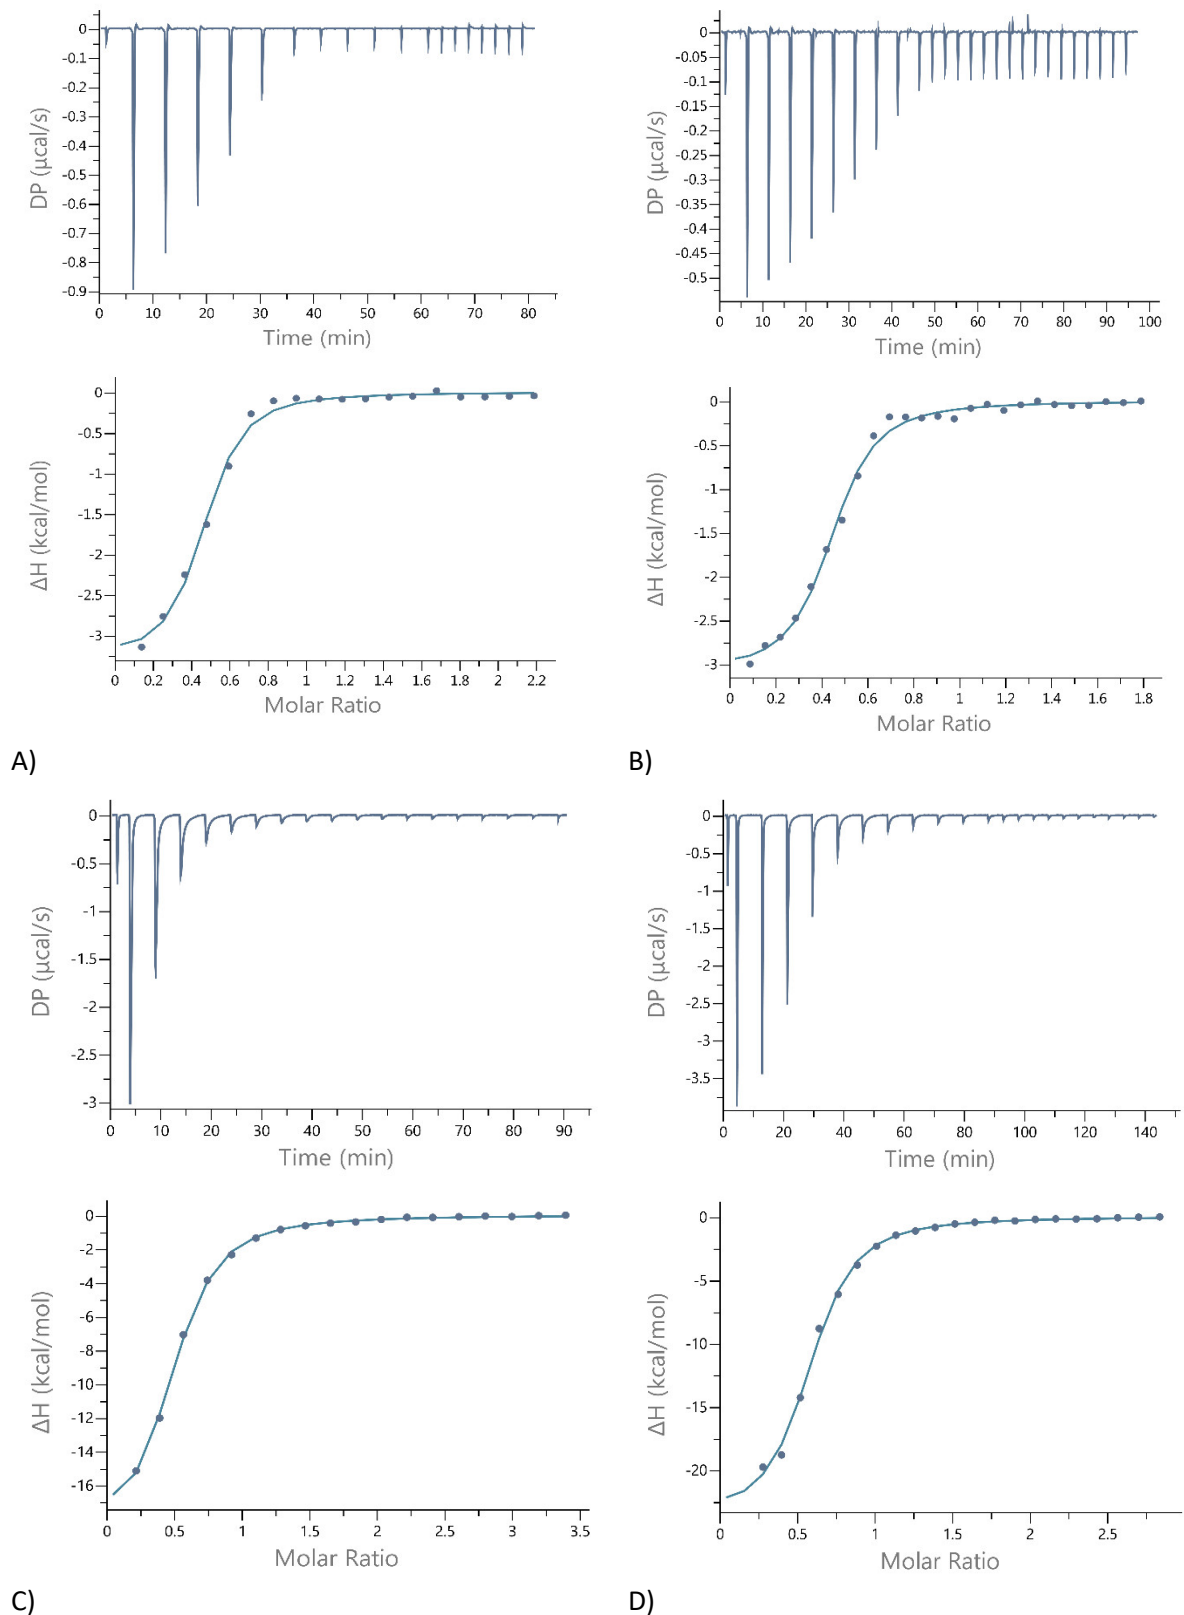

**Figure S2.** The best-fit ITC data for the 37 °C titration of 1-2mM Ni(II) into (A) Hpn11, (B) Hpn12, (C) Hpn13, (D) Hpn13a peptides in 20mM HEPES buffer + 100mM NaCl, pH 7.40. The peptides concentration was within the range of 109-128 μM.

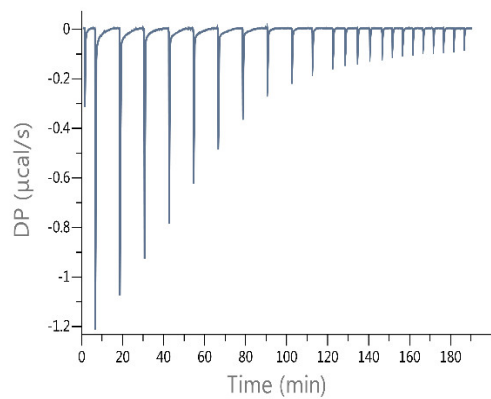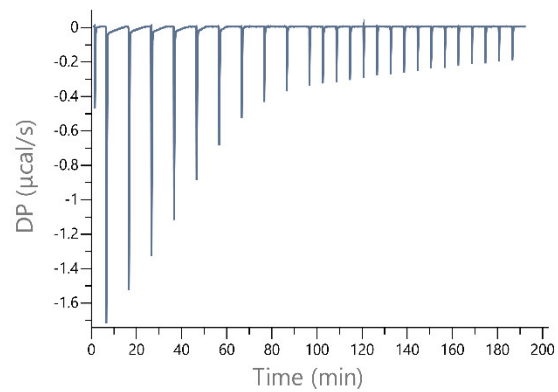

A)

B)

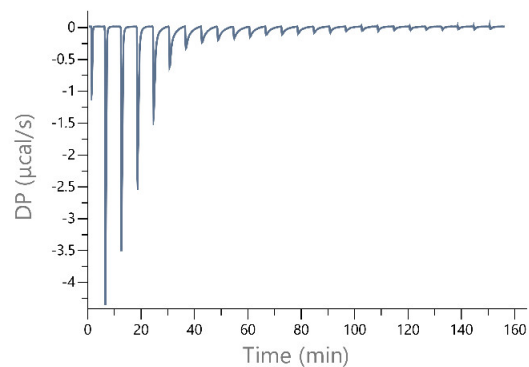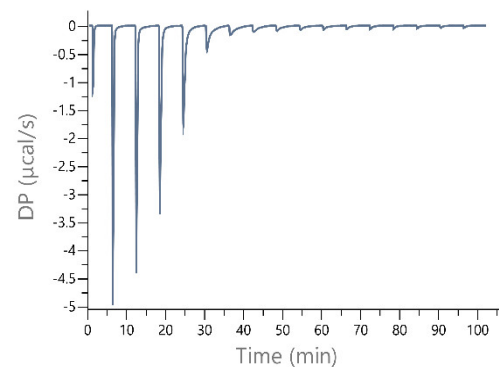

C)

D)

**Figure S3.** The best-fit ITC data for the 25 °C titration of 2mM Ni(II) into (A) Hpn11, (B) Hpn12, (C) Hpn13, (D) Hpn13a peptides in 20mM TRIS-HCl buffer + 500mM NaCl, pH 7.40. The peptides concentration was within the range of 106-171  $\mu$ M.

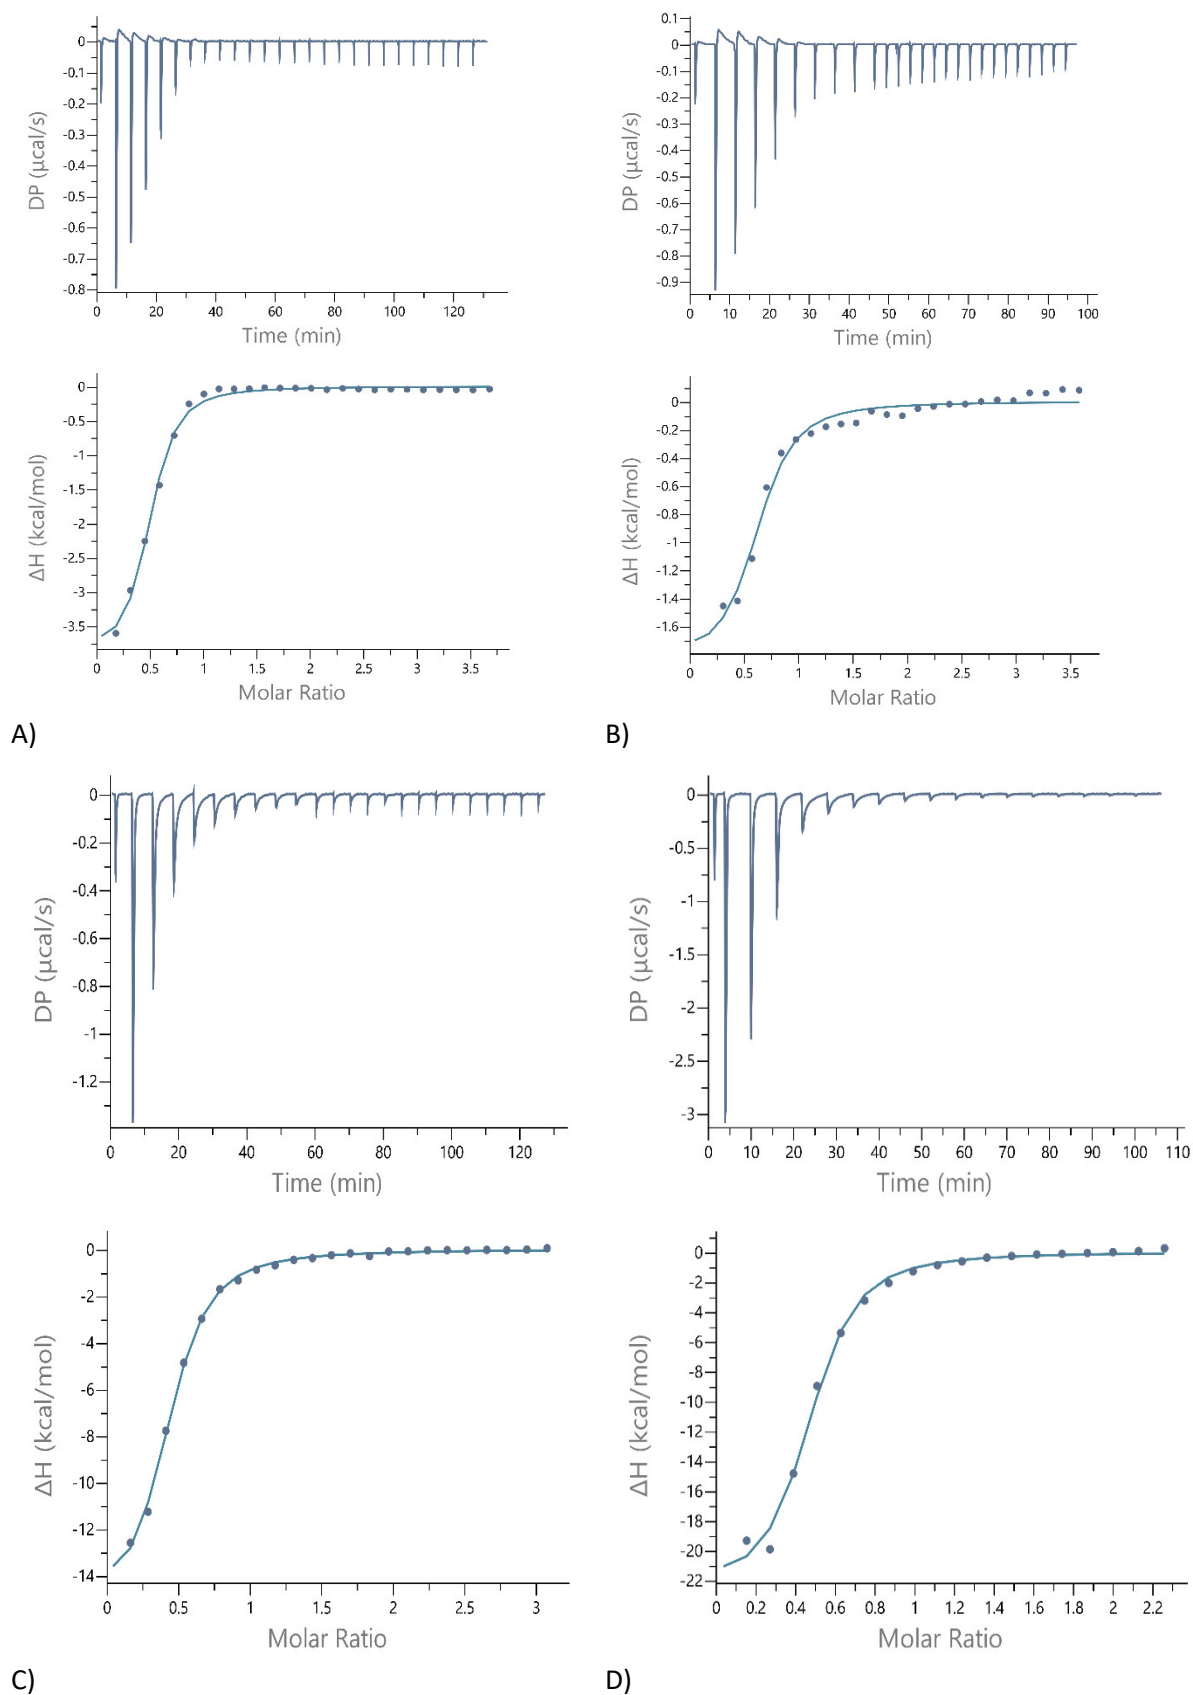

**Figure S4.** The best-fit ITC data for the 25 °C titration of 2mM Ni(II) into (A) Hpn11, (B) Hpn12, (C) Hpn13, (D) Hpn13a peptides in 20mM HEPES buffer + 100mM NaCl, pH 7.40. The peptides concentration was within the range of 109-122 μM.

**Table S1.** Potentiometric data for Ni (II) complexes with Hpn11 (MAHHEQQQQQQA-NH<sub>2</sub>) and Hpn12 (MAHHEQQHQA-NH<sub>2</sub>). Titrations were carried out over the pH range 2–11 at T = 25 °C in an aqueous solution with 4 mM HCl and 0.1 M KCl. The peptide concentration was 0.001 M and the Ni(II)-to-peptide ratios were 1:1, and 1:2.

| Species            | Hpn11 MAHHEQQQQQQA-NH <sub>2</sub> |      |             |      | Hpn12 MAHHEQQHQA-NH <sub>2</sub> |      |             |      |
|--------------------|------------------------------------|------|-------------|------|----------------------------------|------|-------------|------|
|                    | Ni:L 1:1                           |      | Ni:L 1:2    |      | Ni:L 1:1                         |      | Ni:L 1:2    |      |
|                    | log $\beta$                        | logK | log $\beta$ | logK | log $\beta$                      | logK | log $\beta$ | logK |
| NiLH <sub>2</sub>  | 17.61 (7)                          |      | 18.31 (8)   |      |                                  |      |             |      |
| NiLH               |                                    |      |             |      | 12.15 (5)                        |      | 12.23 (5)   |      |
| NiL                | 5.76 (7)                           |      | 6.58 (6)    |      |                                  |      |             |      |
| NiLH <sub>-1</sub> |                                    |      |             |      | -0.24 (3)                        |      | -0.81 (4)   |      |
| NiLH <sub>-2</sub> | -6.64 (9)                          |      | -6.61 (8)   |      | -7.46 (6)                        | 7.22 | -8.05 (9)   | 7.24 |
| NiLH <sub>-3</sub> |                                    |      | -13.72 (9)  | 7.11 |                                  |      |             |      |

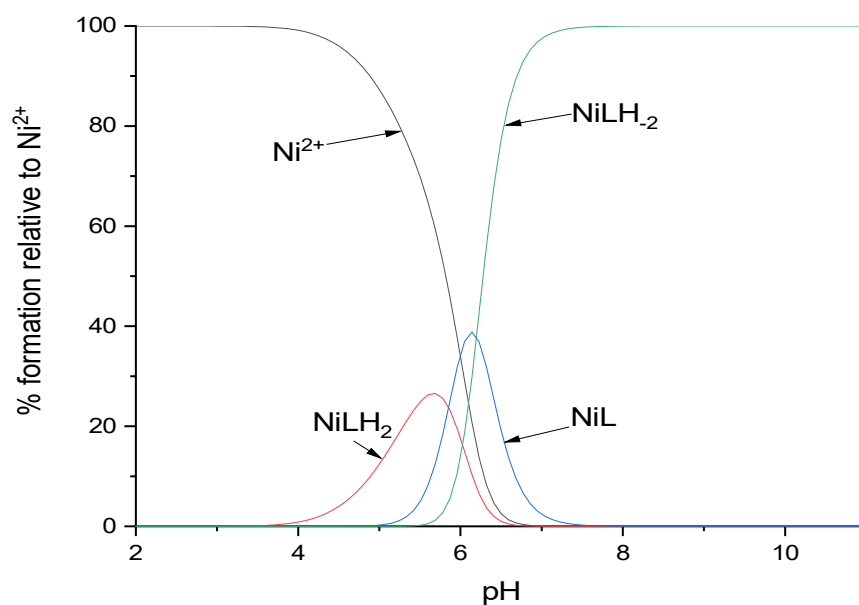

**Figure S5.** Species distribution profiles for Ni(II) complexes of MAHHEQQQQQQA- $\text{NH}_2$ . Metal to ligand ratio = 1:1.

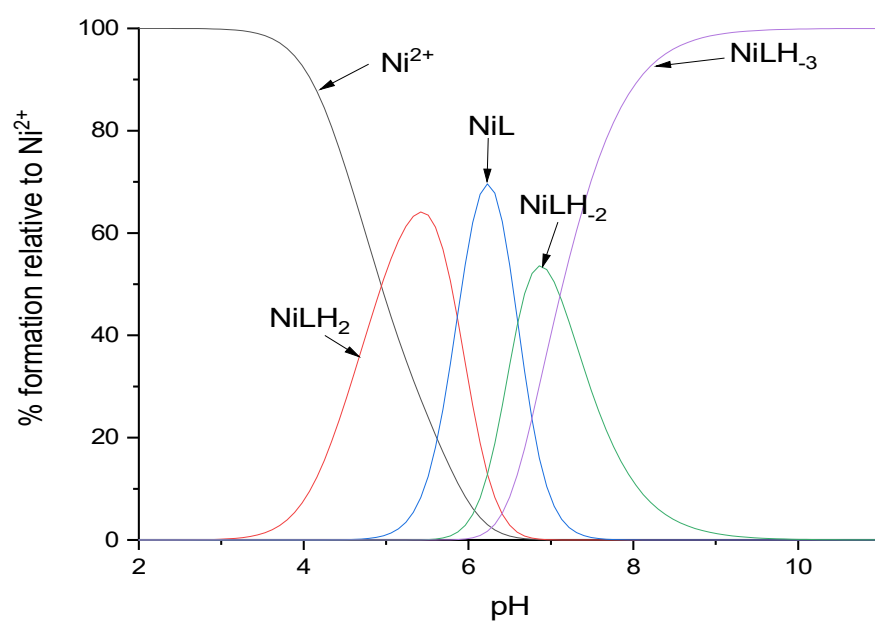

**Figure S6.** Species distribution profiles for Ni(II) complexes of MAHHEQQQQQQA- $\text{NH}_2$ . Metal to ligand ratio = 1:2.

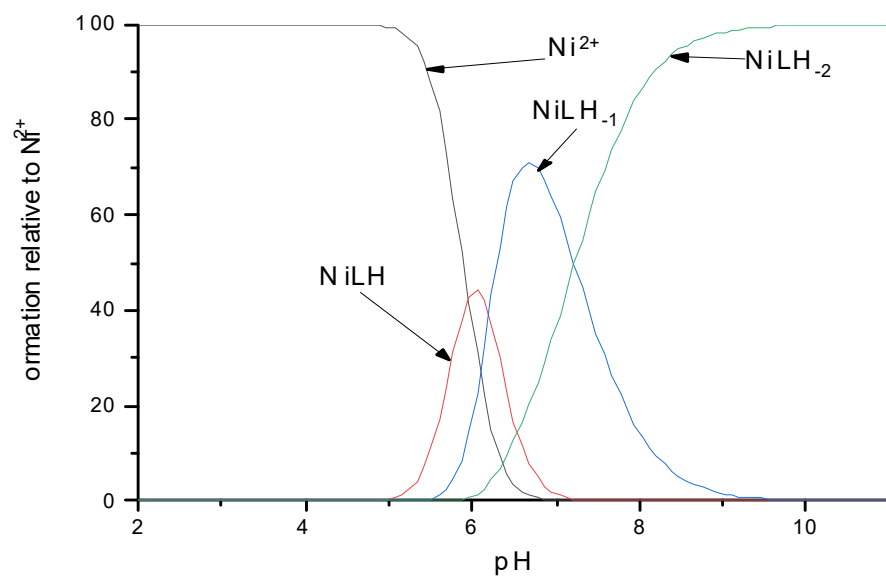

**Figure S7.** Species distribution profiles for Ni(II) complexes of MAHHEQQHQA-NH<sub>2</sub>. Metal to ligand ratio = 1:1.

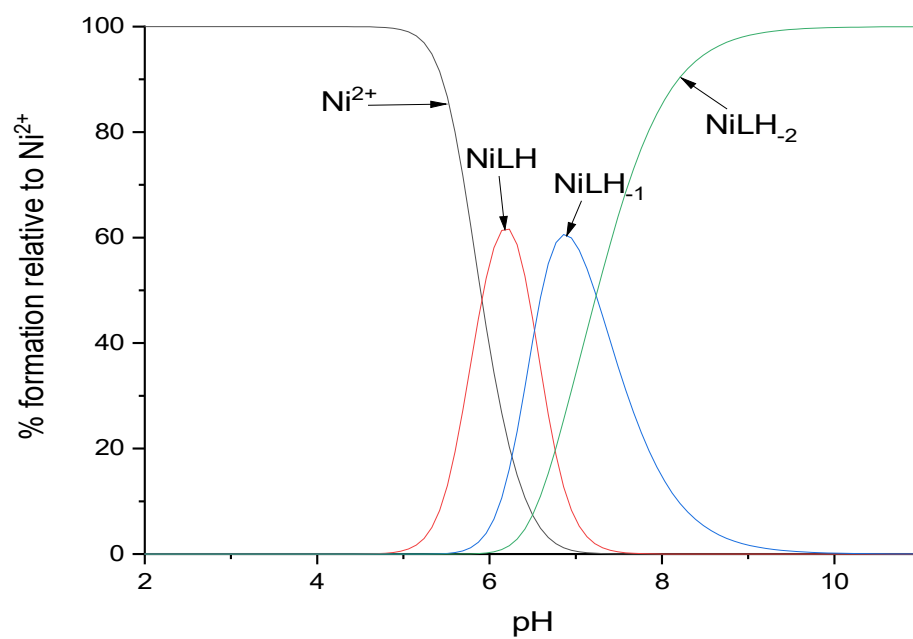

**Figure S8.** Species distribution profiles for Ni(II) complexes of MAHHEQQHQA-NH<sub>2</sub>. Metal to ligand ratio = 1:2.

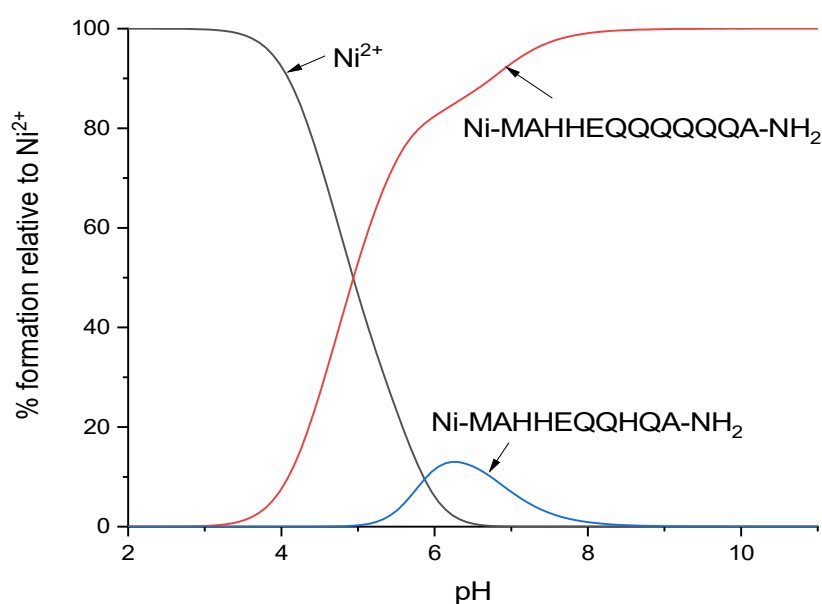

**Figure S9.** Competition plot for MAHHEQQQQQA-NH<sub>2</sub>, MAHHEQQHQA-NH<sub>2</sub>, and Ni(II) showing the relative amount of each complex at different pH values for the hypothetical situation in which equimolar amounts of the two species are mixed. [Ni(II)]=0.0005 M. Ni(II) to ligand ratio of 0.5:1:1.

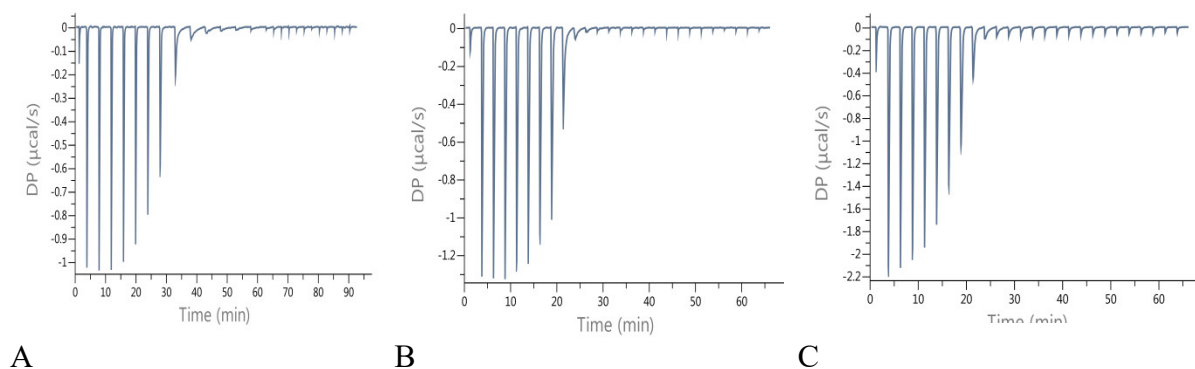

**Figure S10.** ITC traces of 1mM Ni(II) to 0.1 mM EDTA titration in (A) HEPES, (B) MOPS, and (C) TRIS buffer, pH 7.4. The average  $\Delta H_{ITC}$  for at least 2 best fit titration was  $-7.94 \pm 0.2$  kcal/mol;  $-9.73 \pm 0.21$  kcal/mol; and  $-17.4 \pm 0.16$  kcal/mol for HEPES, MOPS, and TRIS buffer, respectively.



Ni(II) : Hpn1

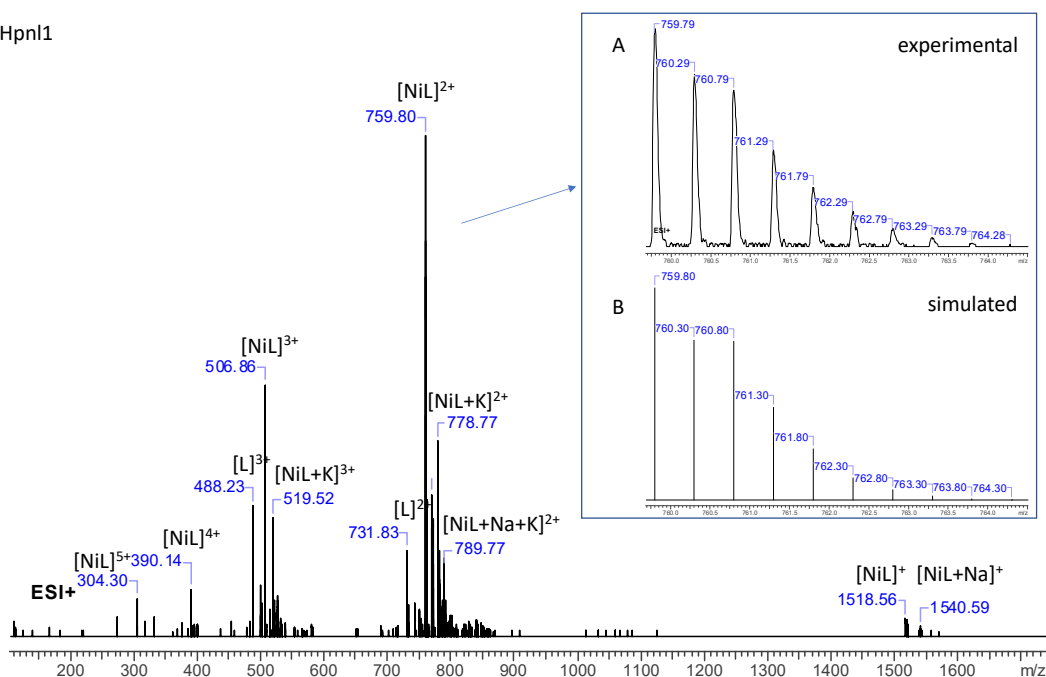

**Figure S11.** ESI positive mass spectrum (ESI-MS) for the Ni(II):Hpn1 system with experimental (A) and simulated (B) spectra for chosen signal,  $[\text{NiL}]^{2+}$ . Metal:ligand in a 1:1 stoichiometry, where  $[\text{ligand}]_{\text{tot}} = 0.1$  mM. Measurements were prepared in water/methanol (50/50, v/v) mixture at pH 7.40.

Ni(II) : Hpn12

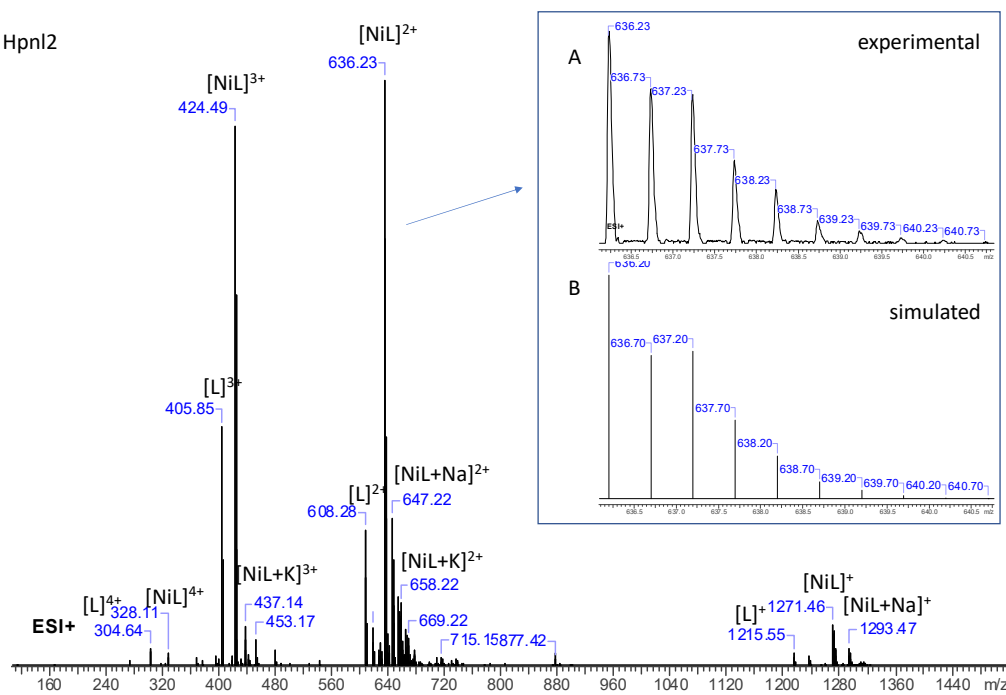

**Figure S12.** ESI positive mass spectrum (ESI-MS) for the Ni(II):Hpn12 system with experimental (A) and simulated (B) spectra for chosen signal,  $[\text{NiL}]^{2+}$ . Metal:ligand in a 1:1 stoichiometry, where  $[\text{ligand}]_{\text{tot}} = 0.1$  mM. Measurements were prepared in water/methanol (50/50, v/v) mixture at pH 7.40.

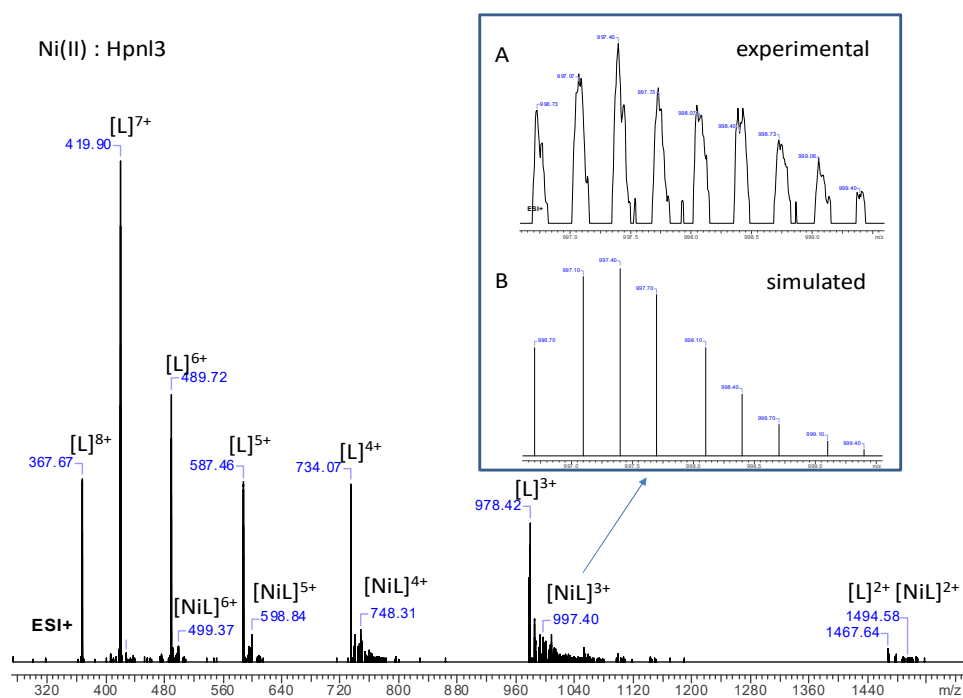

**Figure S13.** ESI positive mass spectrum (ESI-MS) for the Ni(II):Hpn13 system with experimental (A) and simulated (B) spectra for chosen signal,  $[\text{NiL}]^{3+}$ . Metal:ligand in a 1:1 stoichiometry, where  $[\text{ligand}]_{\text{tot}} = 0.1$  mM. Measurements were prepared in water/methanol (50/50, v/v) mixture at pH 7.40.

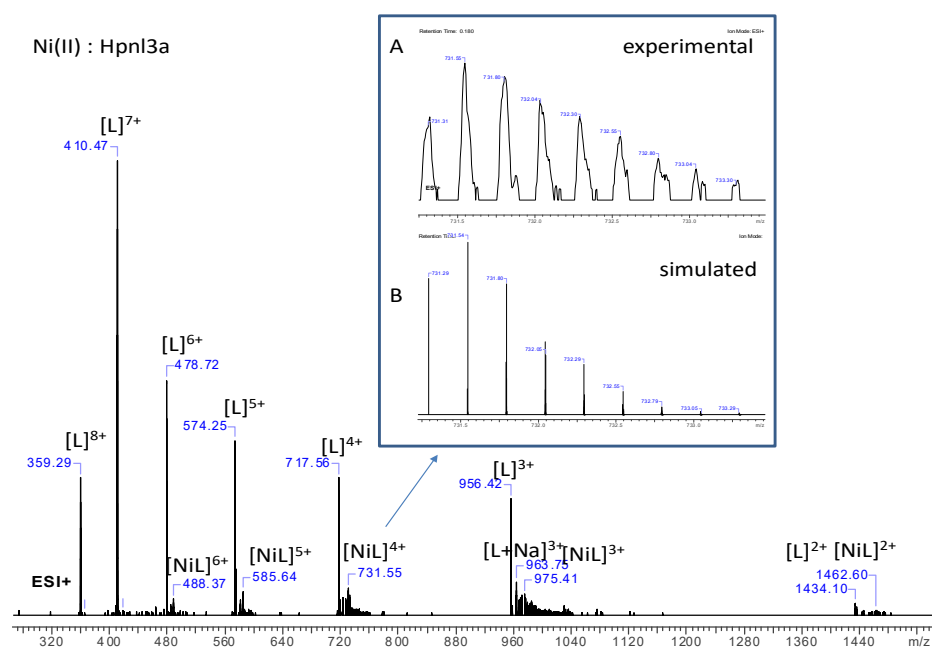

**Figure S14.** ESI positive mass spectrum (ESI-MS) for the Ni(II):Hpn13a system with experimental (A) and simulated (B) spectra for chosen signal,  $[\text{NiL}]^{3+}$ . Metal:ligand in a 1:1 stoichiometry, where  $[\text{ligand}]_{\text{tot}} = 0.1$  mM. Measurements were prepared in water/methanol (50/50, v/v) mixture at pH 7.40.

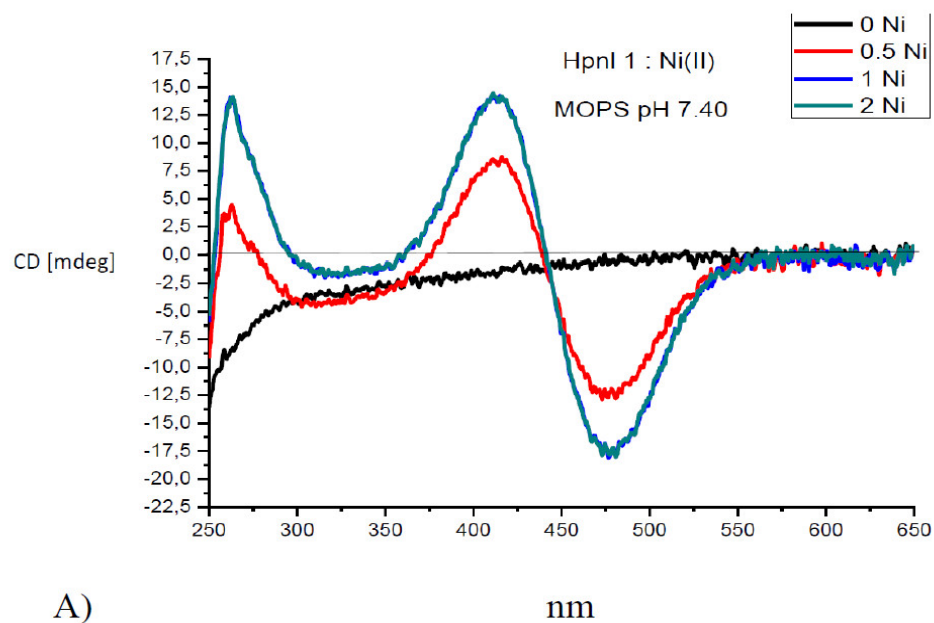

A)

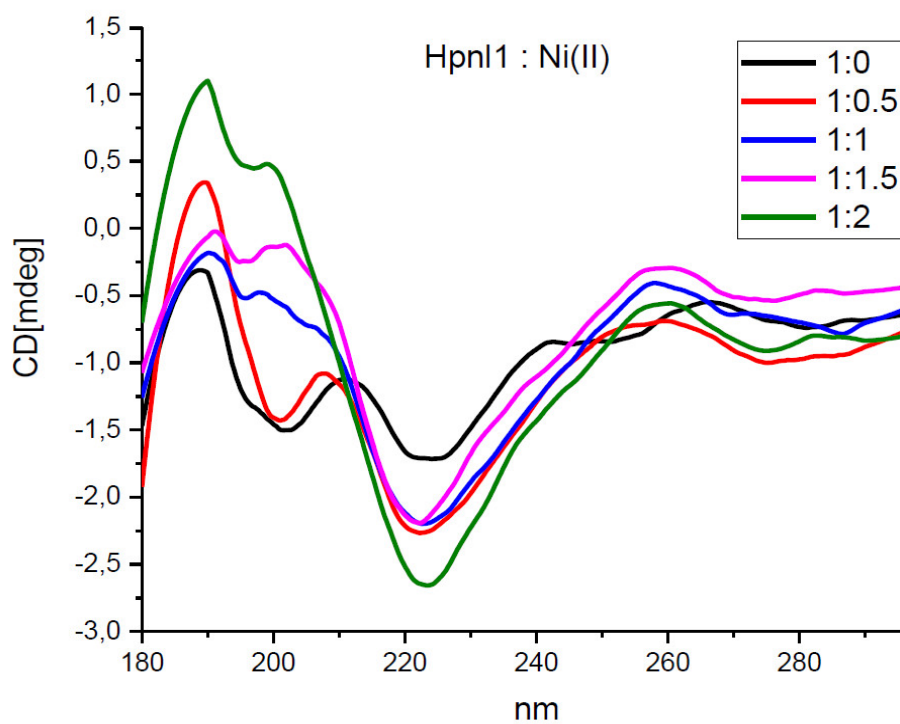

B)

**Figure S15.** (A) The visible CD and (B) far-UV CD spectra of Ni(II) complexes of MAHHEQQQQQA-NH<sub>2</sub> (HpnI1) peptide, pH 7,4.

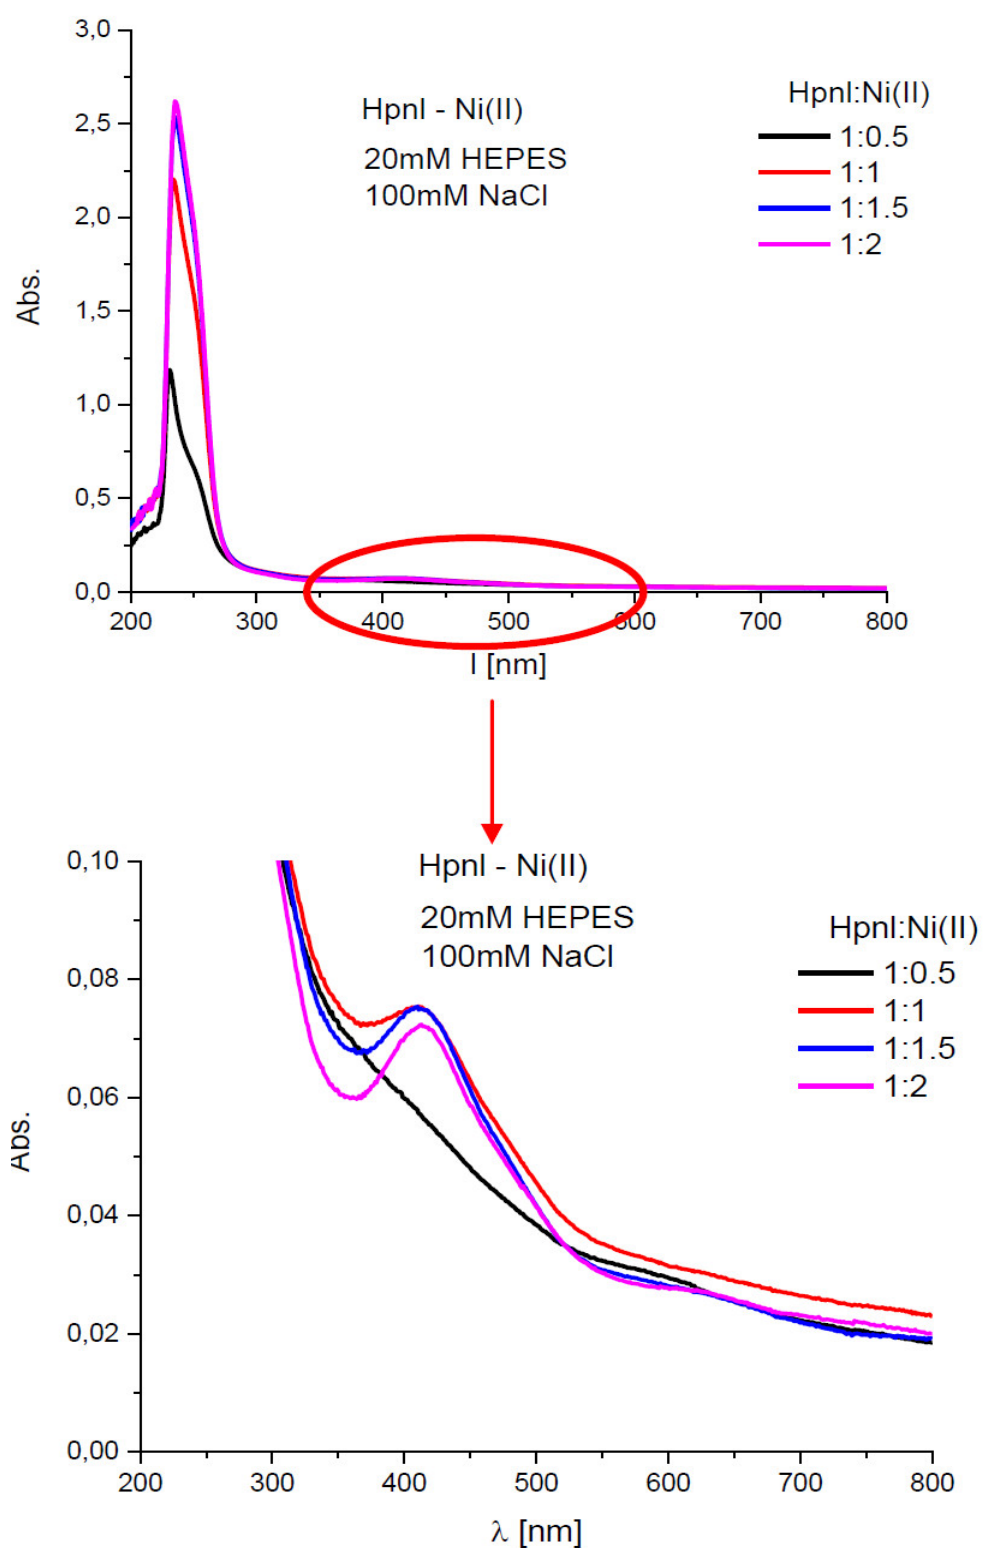

**Figure S16.** UV-Vis spectra of Ni(II) complexes of MAHHEQQQQQQA-NH<sub>2</sub> (HpnI1) peptide, pH 7.4.

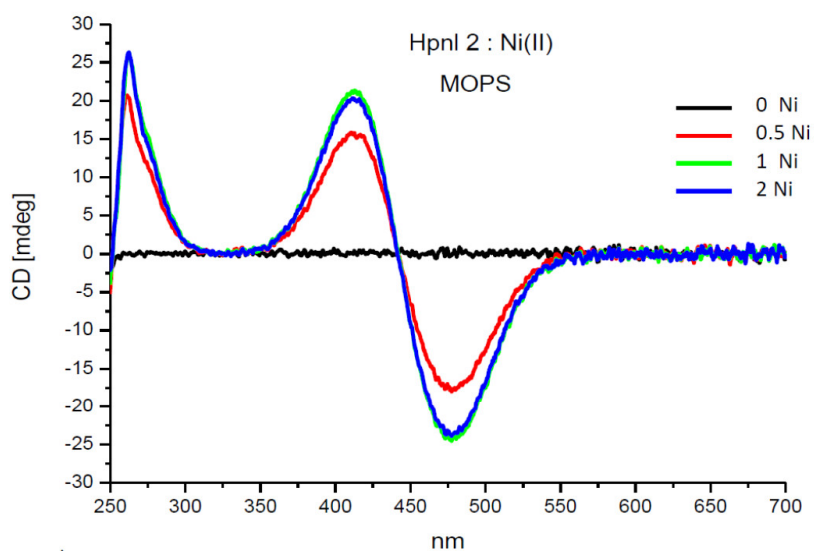

A)

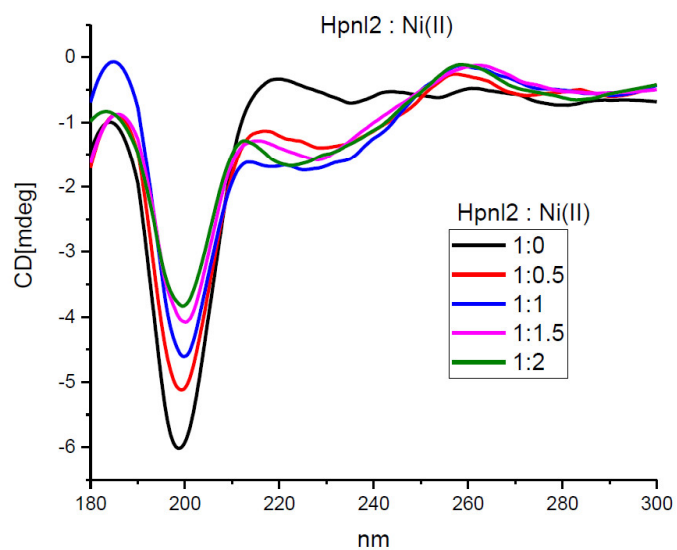

B)

**Figure S17.** (A) The visible CD and (B) far-UV CD spectra of Ni(II) complexes of HpnI 2 (MAHHEQQHQA-NH<sub>2</sub>) peptide, pH 7,4.

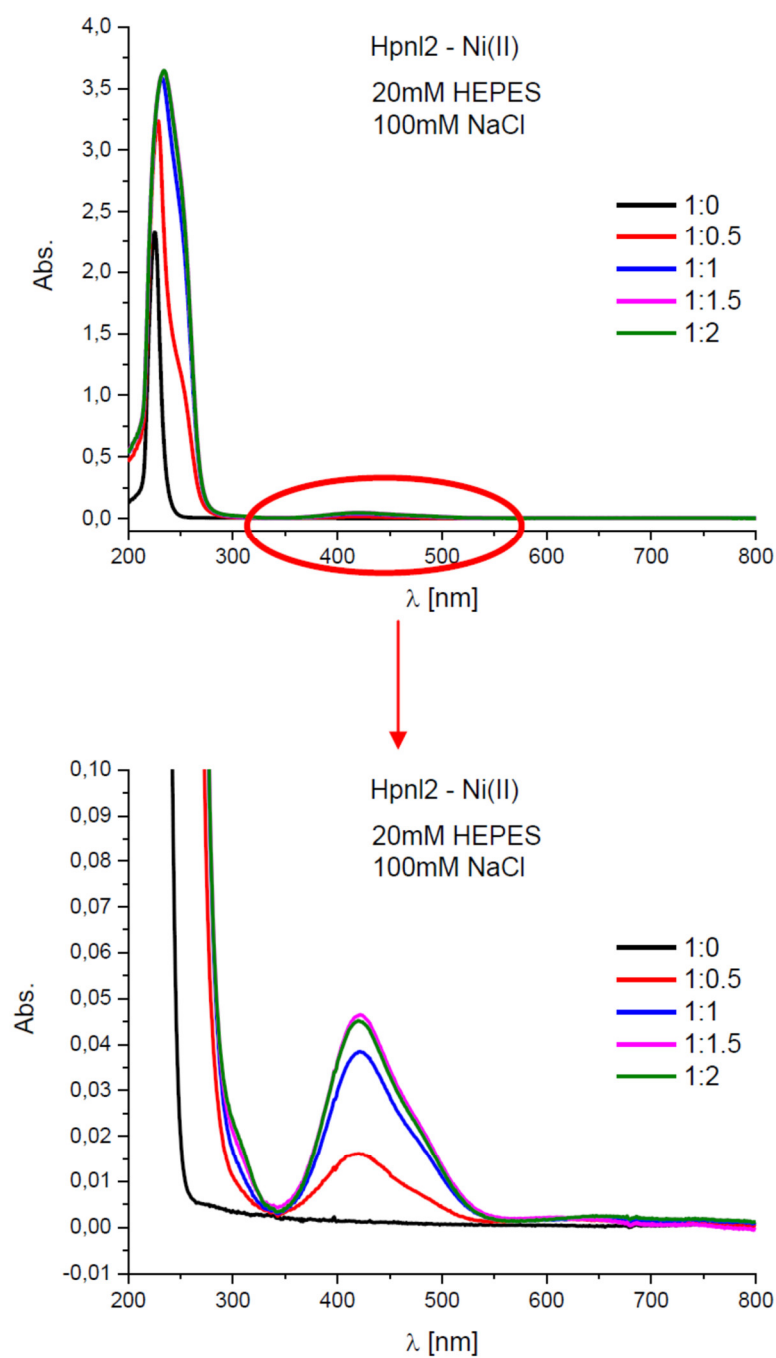

**Figure S18.** UV-Vis spectra of Ni(II) complexes of HpnI 2 (MAHHEQQHQA-NH<sub>2</sub>) peptide, pH 7,4.
